# Supplementary material for: Remodeling of Stromal Immune Microenvironment by Urolithin A Improves Survival with Immune Checkpoint Blockade in Pancreatic Cancer
Source: PubMed Central journal article supplement (PMC10337606; doi:10.1158/2767-9764.crc-22-0329), 2023-07-12
Supplement: crc-22-0329-s02.pdf [file crc-22-0329-s02.pdf]

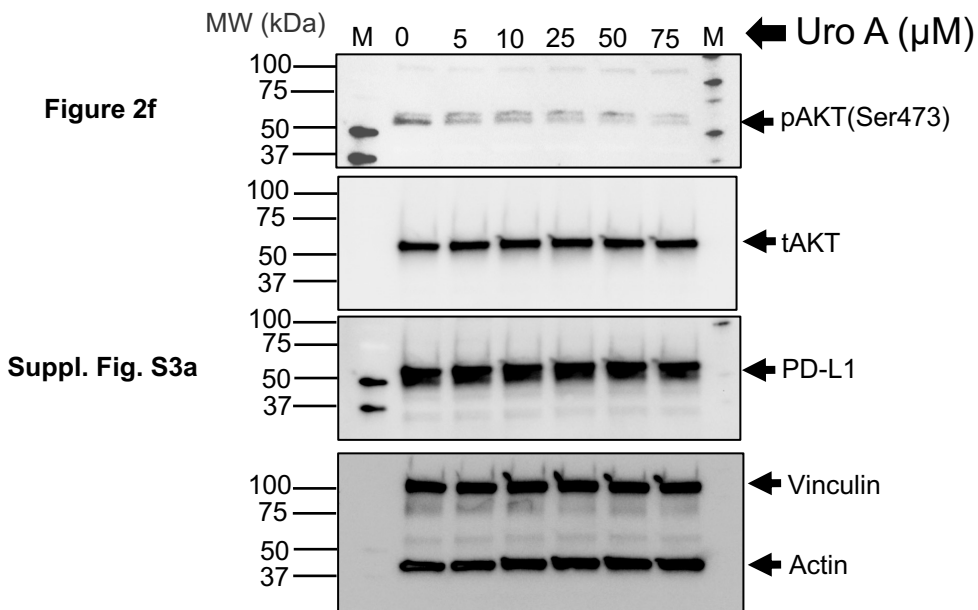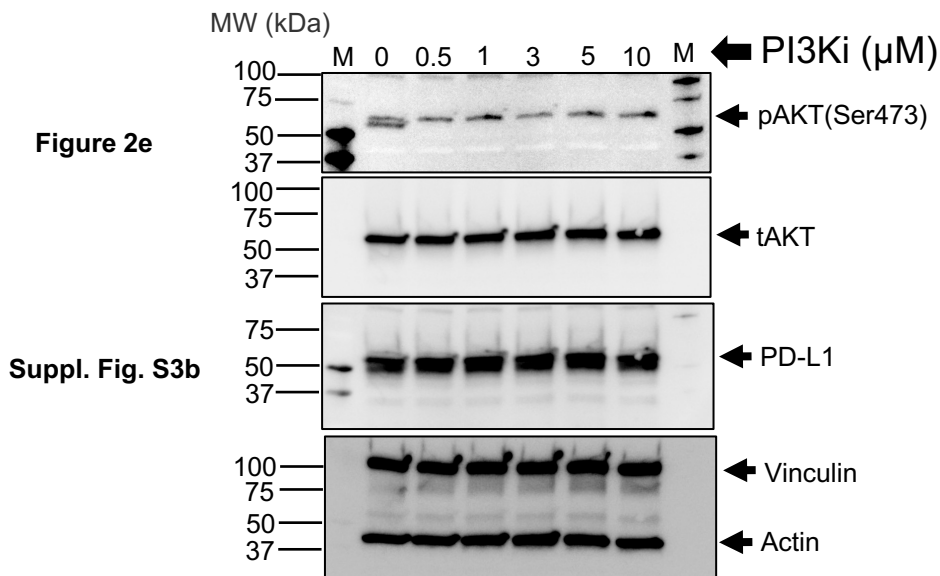

**Supplementary Figure S2.** Raw uncropped images of Western blot membranes for Figs. 2e, 2f, S3a and S3b.
