# Supplementary material for: Remodeling of Stromal Immune Microenvironment by Urolithin A Improves Survival with Immune Checkpoint Blockade in Pancreatic Cancer
Source: PubMed Central journal article supplement (PMC10337606; doi:10.1158/2767-9764.crc-22-0329), 2023-07-12
Supplement: crc-22-0329-s03.pdf [file crc-22-0329-s03.pdf]

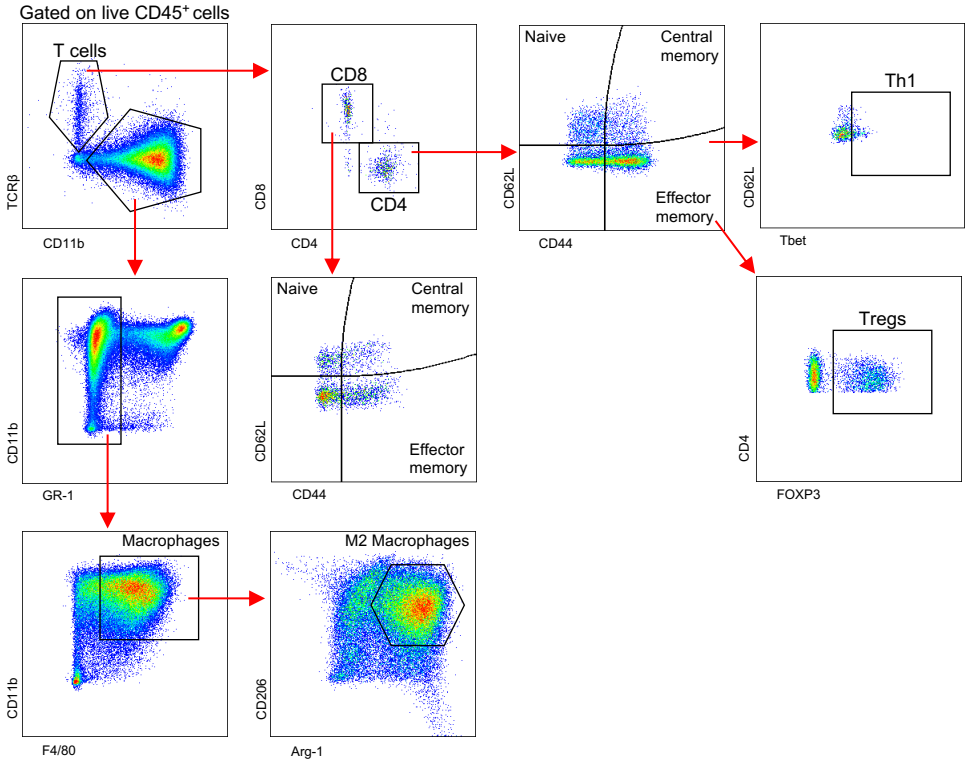

**Supplementary Figure S3. Gating strategies used for flow cytometry analysis.** Representative dot plots depict gating strategies used for intratumoral macrophages and T-cell analysis in flow cytometry experiments in PKT mice across all treatment cohorts.
