# Supplementary material for: Remodeling of Stromal Immune Microenvironment by Urolithin A Improves Survival with Immune Checkpoint Blockade in Pancreatic Cancer
Source: PubMed Central journal article supplement (PMC10337606; doi:10.1158/2767-9764.crc-22-0329), 2023-07-12
Supplement: crc-22-0329-s04.pdf [file crc-22-0329-s04.pdf]

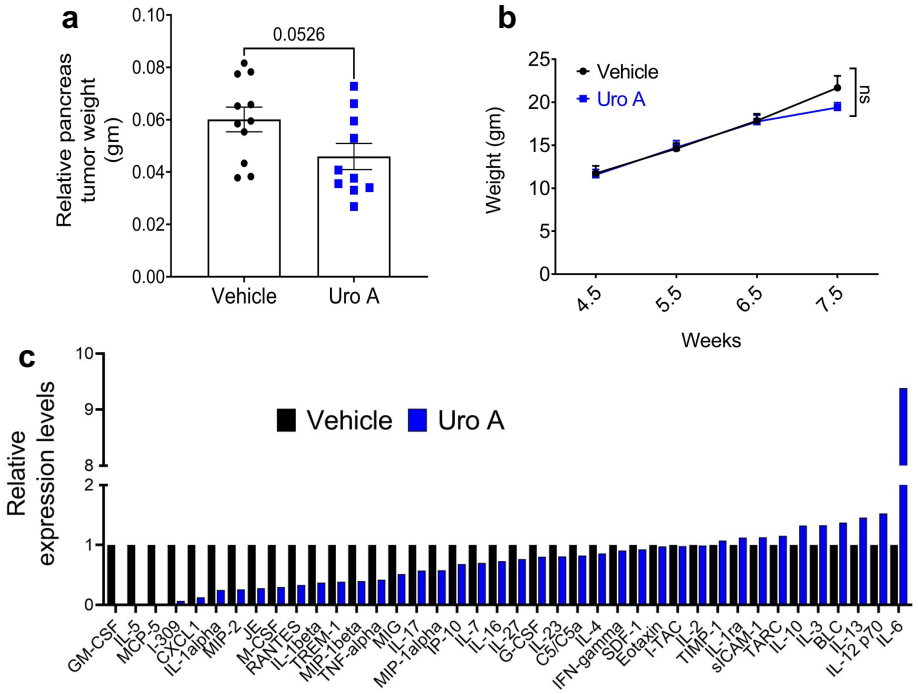

**Supplementary Figure S4. Tumor weight, mouse weight and cytokine profiling of Uro A treatment in PKT mice. (a)** Relative pancreas tumor weight normalized to body weight in PKT mice treated with Uro A or vehicle. **(b)** Body weights of PKT mice were recorded weekly during the treatment regimen across all groups. **(c)** Profiling of intratumoral immunomodulatory cytokines in Uro A or vehicle-treated PKT mice. ns: non-significant.
