# Supplementary material for: Remodeling of Stromal Immune Microenvironment by Urolithin A Improves Survival with Immune Checkpoint Blockade in Pancreatic Cancer
Source: PubMed Central journal article supplement (PMC10337606; doi:10.1158/2767-9764.crc-22-0329), 2023-07-12
Supplement: crc-22-0329-s05.pdf [file crc-22-0329-s05.pdf]

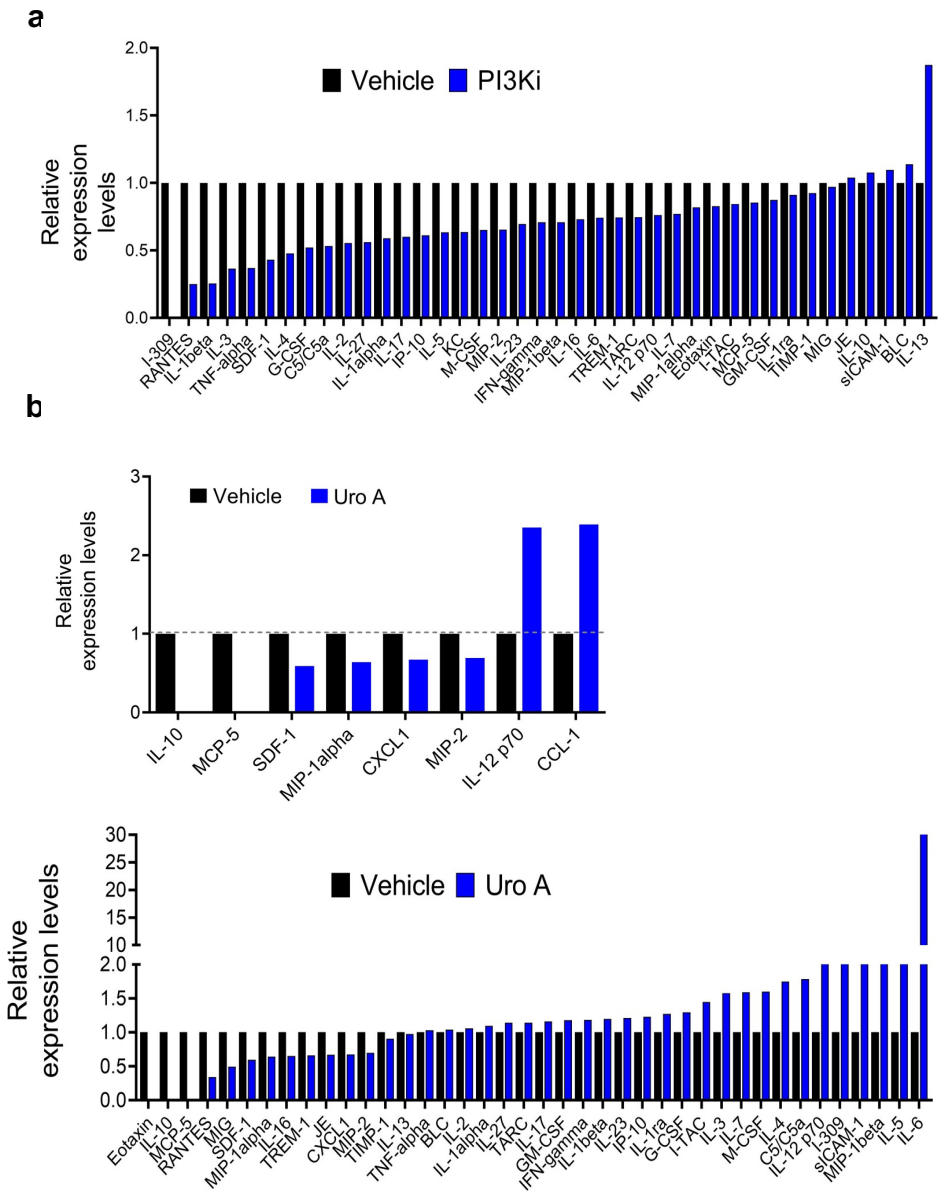

**Supplementary Figure S5. Cytokine profiling of PKT tumors and KPC cells treated with PI3Ki or Uro A. (a)** Profiling of intratumoral immunomodulatory cytokines in Omipalisib (PI3Ki) treated or vehicle-treated PKT mice. **(b)** Profiling of immunomodulatory secretome in the conditioned media of KPC PDAC tumor cells harvested after Uro A (25 $\mu$ M) treatment for 3 hours.
