# Supplementary material for: Remodeling of Stromal Immune Microenvironment by Urolithin A Improves Survival with Immune Checkpoint Blockade in Pancreatic Cancer
Source: PubMed Central journal article supplement (PMC10337606; doi:10.1158/2767-9764.crc-22-0329), 2023-07-12
Supplement: crc-22-0329-s06.pdf [file crc-22-0329-s06.pdf]

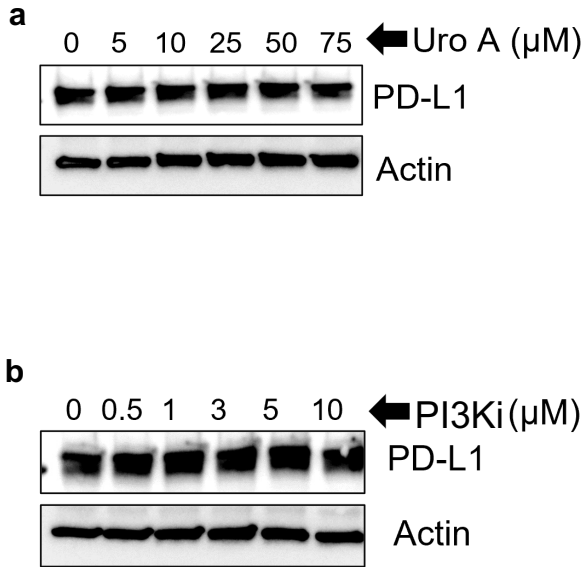

**Supplementary Figure S6. PD-L1 expression in Uro A or PI3Ki treated KPC cells.** (a) and (b) Western blot analysis of KPC PDAC cells demonstrating PD-L1 expression with increasing concentration of Uro A (5-75 $\mu\text{M}$ ) and PI3Ki (0.5-10 $\mu\text{M}$ ).
