# Supplementary material for: Remodeling of Stromal Immune Microenvironment by Urolithin A Improves Survival with Immune Checkpoint Blockade in Pancreatic Cancer
Source: PubMed Central journal article supplement (PMC10337606; doi:10.1158/2767-9764.crc-22-0329), 2023-07-12
Supplement: crc-22-0329-s07.pdf [file crc-22-0329-s07.pdf]

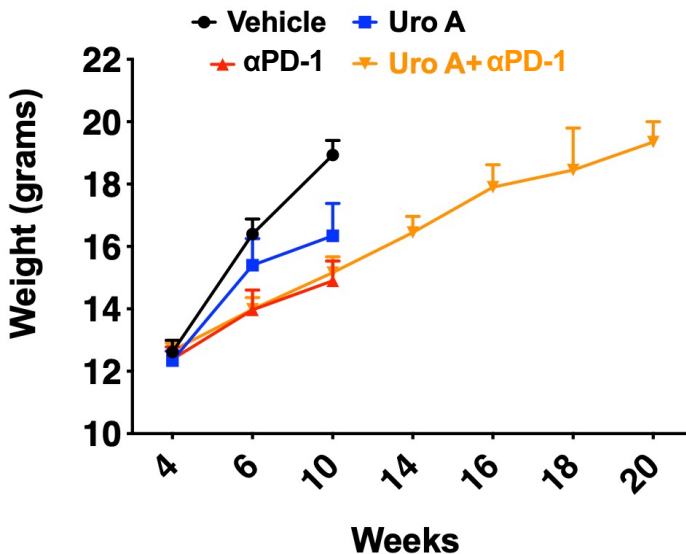

**Supplementary Figure S7. Recorded body weights of PKT mice treated with Uro A, αPD-1 and Uro A+αPD-1.** PKT mice body weights were recorded weekly while mice received vehicle control, Uro A (20 mg/kg/daily), anti-PD-1 antibody (200µg/mouse), or a combination of Uro A with anti-PD-1 antibody. ns: non-significant.
